# Supplementary material for: Gut microbiota-mediated lysophosphatidylcholine generation promotes colitis in intestinal epithelium-specific Fut2 deficiency
Source: PubMed Central journal article supplement (PMC7958775; doi:10.1186/s12929-021-00711-z), 2021-03-15
Supplement: 12929_2021_711_MOESM1_ESM.pdf [file 12929_2021_711_MOESM1_ESM.pdf]

Supplementary Table.1

| Gene                           | Forward primer (5'- 3')  | Reverse primer(5'- 3')    |
|--------------------------------|--------------------------|---------------------------|
| human                          |                          |                           |
| <i>Gapdh</i>                   | CCCCACTTGATTTTGGAGGGA    | AGGGCTGCTTTTAACTCTGGT     |
| <i>Fut2</i>                    | CTACCACCTGAACGACTGGATG   | AGGGTGAACTCCTGGAGGATCT    |
| <i>ZO-1</i>                    | CCATTCCCGAAGGAGTTGA      | CGACGAGGAGTCGGATGATTT     |
| <i>occludin</i>                | CTCTCAGCCAGCCTACTCTTT    | CATAGCCATAGCCACTTCCGT     |
| mice                           |                          |                           |
| <i>gapdh</i>                   | CATGGCCTTCCGTGTTCTTA     | TACTTGGCAGGTTTCTCCAGG     |
| <i>fut2</i>                    | ACCACAGCCAGAAGAGGATTG    | GAAAGGTACCTGGGCACTCG      |
| <i>tnf-<math>\alpha</math></i> | CATCTTCTCAAATTCGAGTGACAA | TGGGAGTAGACAAGGTACAACCC   |
| <i>ccl2</i>                    | TTGGCTCAGCCAGATGCA       | CCTACTCATTGGGATCATCTTGC   |
| <i>il-1<math>\beta</math></i>  | CCGTGGACCTTCCAGGATGA     | GGGAACGTCACACACCAGCA      |
| <i>il-6</i>                    | AGGATACCACTCCCAACAGACCT  | CAAGTGCATCATCGTTGTTTCATAC |
| <i>cxcl-1</i>                  | TGCACCCAAACCGAAGTCATAGCC | AGCCAGCGTTCACCAGACAGGT    |
| <i>ccl3</i>                    | CCATGACACTCTGCAACCAAG    | ACGATGAATTGGCGTGGAAT      |
| <i>ccl4</i>                    | CCTCCCACTTCTGCTGTTT      | GCTTGGAGCAAAGACTGCTG      |
| <i>ccl5</i>                    | GCCCACGTCAAGGAGTATTTT    | CACACACTTGGCGGTTTCCTT     |
| <i>ZO-1</i>                    | GCTTTAGCGAACAGAAGGAGC    | TTCATTTTTCCGAGACTTCACCA   |
| <i>occludin</i>                | TGAAAGTCCACCTCCTTACAGA   | CCGGATAAAAAGAGTACGCTGG    |

## Supplementary Figure 1

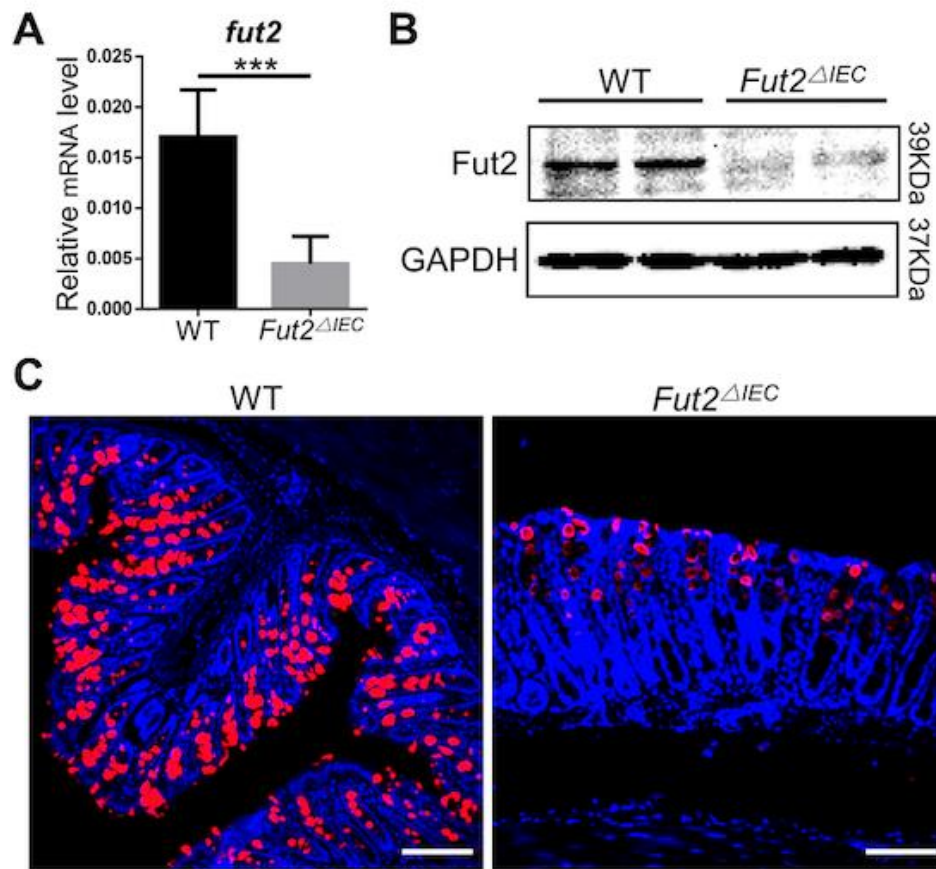

**Supplementary Figure 1.** (A) The mRNA level of *Fut2* in colonic epithelial cells of WT and *Fut2*<sup>ΔIEC</sup> mice. (B) The proteins level of *Fut2* in colonic epithelial cells of WT and *Fut2*<sup>ΔIEC</sup> mice. GAPDH was used as a loading control. (C) UEA-I staining (red) images of colon tissue in WT and *Fut2*<sup>ΔIEC</sup> mice (Scale bar, 100μm).

Supplementary Figure 2

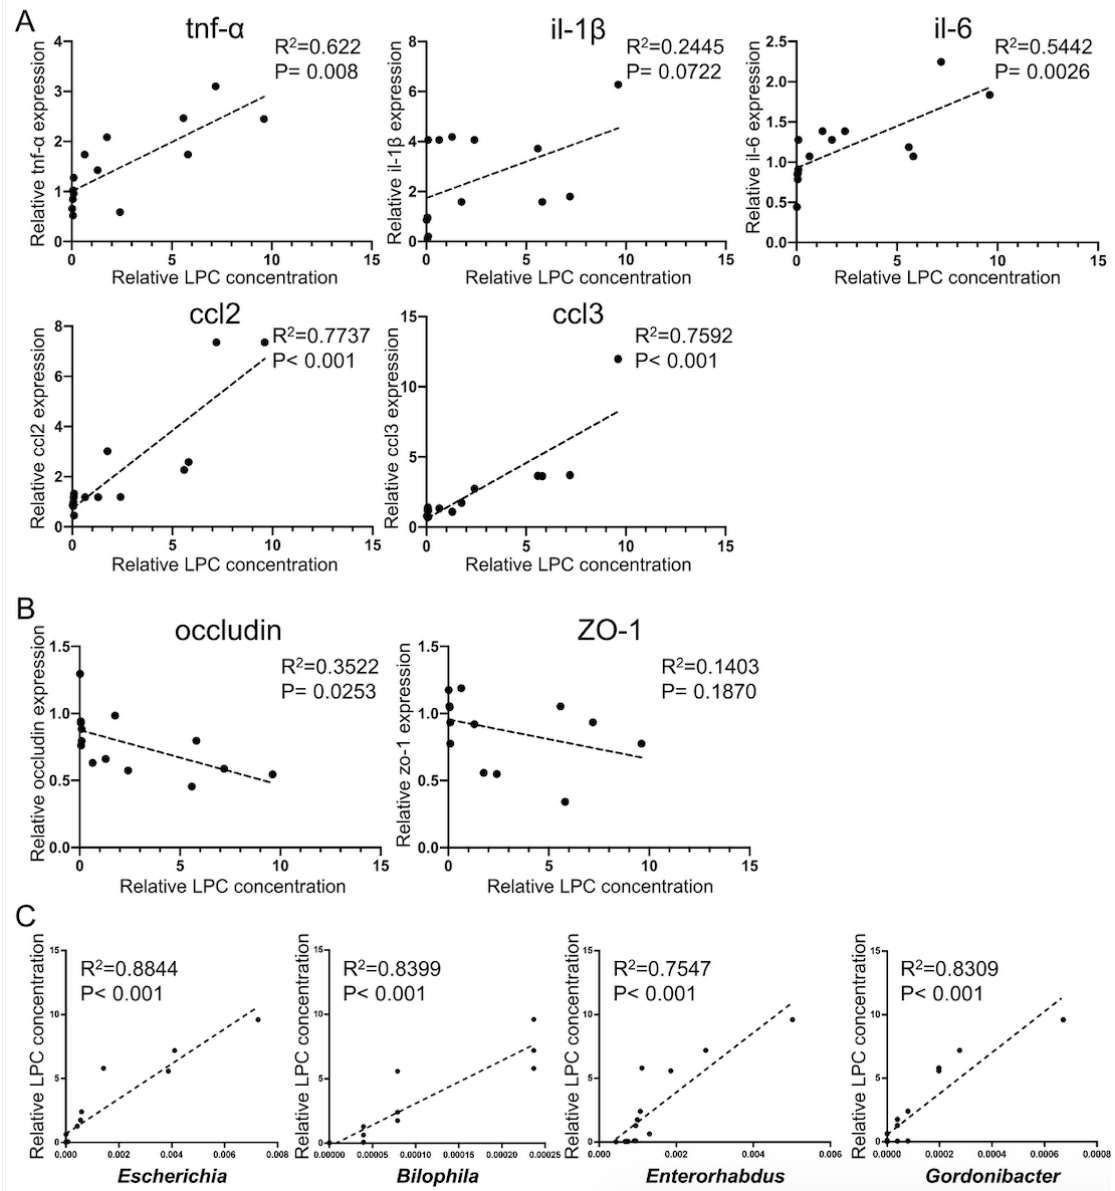

**Supplementary Figure 2.** LPC concentration was positively correlated with colonic pro-inflammatory cytokines and negatively correlated with tight junction genes. It was also correlated with gut microbiota. A) Correlation analysis of LPC and pro-inflammatory cytokines, *tnf- $\alpha$*  ( $P=0.008$ ), *il-1 $\beta$*  ( $P=0.0722$ ), *il6* ( $P=0.0026$ ), *ccl2* ( $P<0.001$ ), *ccl3* ( $P<0.001$ ). (B) Correlation analysis of LPC and epithelial tight junction genes—*occludin* ( $P=0.0253$ ) and *ZO-1* ( $P=0.1870$ ). (C) LPC was positively correlated with *Escherichia*, *Bilophila*, *Enterorhabdus* and *Gordonibacter*. ( $n=14$ )
